# Supplementary material for: Hyperlipidemia and hepatitis in liver-specific CREB3L3 knockout mice generated using a one-step CRISPR/Cas9 system
Source: PubMed Central journal article supplement (PMC4904192; doi:10.1038/srep27857), 2016-06-13
Supplement: srep27857-s1.pdf [file srep27857-s1.pdf]

Supplementary Section to:

**Hyperlipidemia and hepatitis in liver-specific CREB3L3 knockout mice generated using a one-step CRISPR/Cas9 system**

Yoshimi Nakagawa,<sup>1,2,\*</sup> Fusaka Oikawa,<sup>1</sup> Seiya Mizuno,<sup>3</sup> Hiroshi Ohno,<sup>1</sup> Yuka Yagishita,<sup>1</sup> Aoi Satoh,<sup>1</sup> Yoshinori Osaki,<sup>1</sup> Kenta Takei,<sup>1</sup> Takuya Kikuchi,<sup>1</sup> Song-iee Han,<sup>1</sup> Takashi Matsuzaka,<sup>1</sup> Hitoshi Iwasaki,<sup>1</sup> Kazuto Kobayashi,<sup>1</sup> Shigeru Yatoh,<sup>1</sup> Naoya Yahagi,<sup>1</sup> Hiroaki Suzuki,<sup>1</sup> Hirohito Sone,<sup>4</sup> Satoru Takahashi,<sup>2,3,5</sup> Nobuhiro Yamada,<sup>1</sup> Hitoshi Shimano<sup>1,2,\*</sup>

1Department of Internal Medicine (Endocrinology and Metabolism), Faculty of Medicine, University of Tsukuba, Tsukuba, Ibaraki 305-8575, JAPAN

2International Institute for Integrative Sleep Medicine (WPI-IIIS), University of Tsukuba, Tsukuba, Ibaraki 305-8575, JAPAN

3Laboratory Animal Resource Center, University of Tsukuba, Tsukuba, Ibaraki 305-8575, Japan

4Department of Hematology, Endocrinology and Metabolism, Niigata University Faculty of Medicine, Niigata, Niigata 951-8510, Japan

5Department of Anatomy and Embryology, Faculty of Medicine, University of Tsukuba, Tsukuba, Ibaraki 305-8575, Japan

\*Correspondence: ynakagawa@md.tsukuba.ac.jp (Y.N), hshimano@md.tsukuba.ac.jp (H.Shimano)



*Creb3l3* intron 3

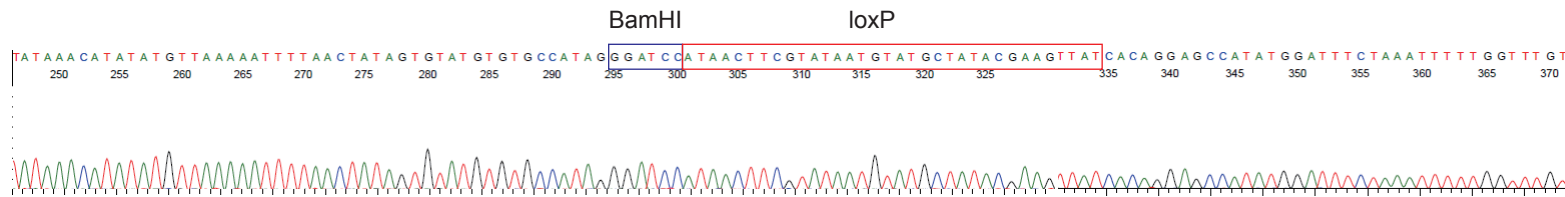

*Creb3l3* intron 11

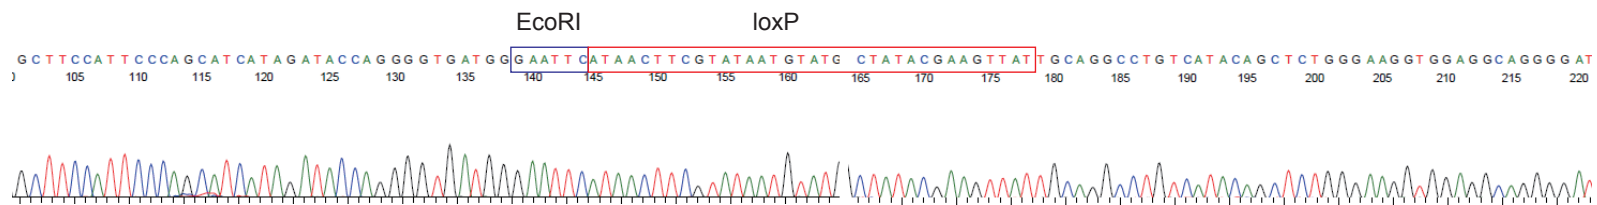

**Supplementary Figure 2** The integration of loxP sites in the intron 3 and 11 of the *Creb3l3* genome. The sequences across the targeting regions confirmed correct fusion of loxP sites to the intron 3 and 11 of the *Creb3l3* genome.

**a**

Seed sequence PAM  
GTGTATGT **GTGCCATAGCACAGG** i3 targeting site  
TCCATTGTGTGTGCATGCACGTGTGCACATGTGCCATAGCACAGGTGTGAGGTCAGAGGTGAGTTTAGGAGAGCA  
chr1:134783344-134783358  
▲  
134783344

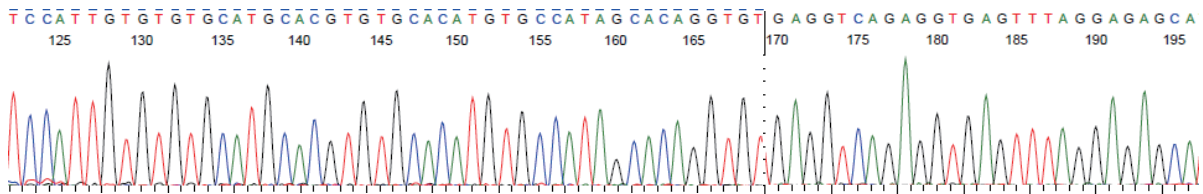

GTGTATGT **GTGCCATAGCACAGG** i3 targeting site  
GTCACAATGCAGGTGTGCCACAGTGCAGGAGTGCCATAGCACAGGTGTGCCACTATGTGGATGTGTTACAGTGCA  
chr1:181415553-181415567  
▲  
181415553

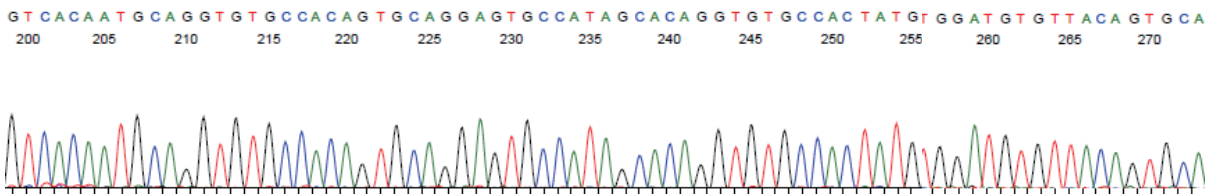

GTGTATGT **GTGCCATAGCACAGG** i3 targeting site  
GCCACGGTACAAGTGTGCCACAGTGCAGAAGTGCCATAGCACAGGTGTGCCACTCTGCAGGTGTGTTACAGTGCA  
chr1:181415729-181415743  
▲  
181415729

Reverse Complement

TGCACTGTAACACACCTGCAGAGTGGCACACCTGTGCTATGGCACTTCTGCACACTGTGGCACACTTGTACCGTGGC  
T **GC** A C T G T A A C A C A C C T G C A G A G T G G C A C A C C T G T G C T A T G G C A C T T C T G C A C T G T G G C A C A C T T G T A C C G T G G C  
260 265 270 275 280 285 290 295 300 305 310 315 320 325 330

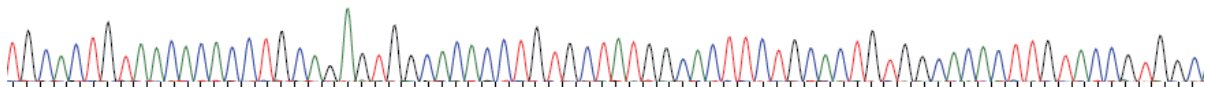

**b**

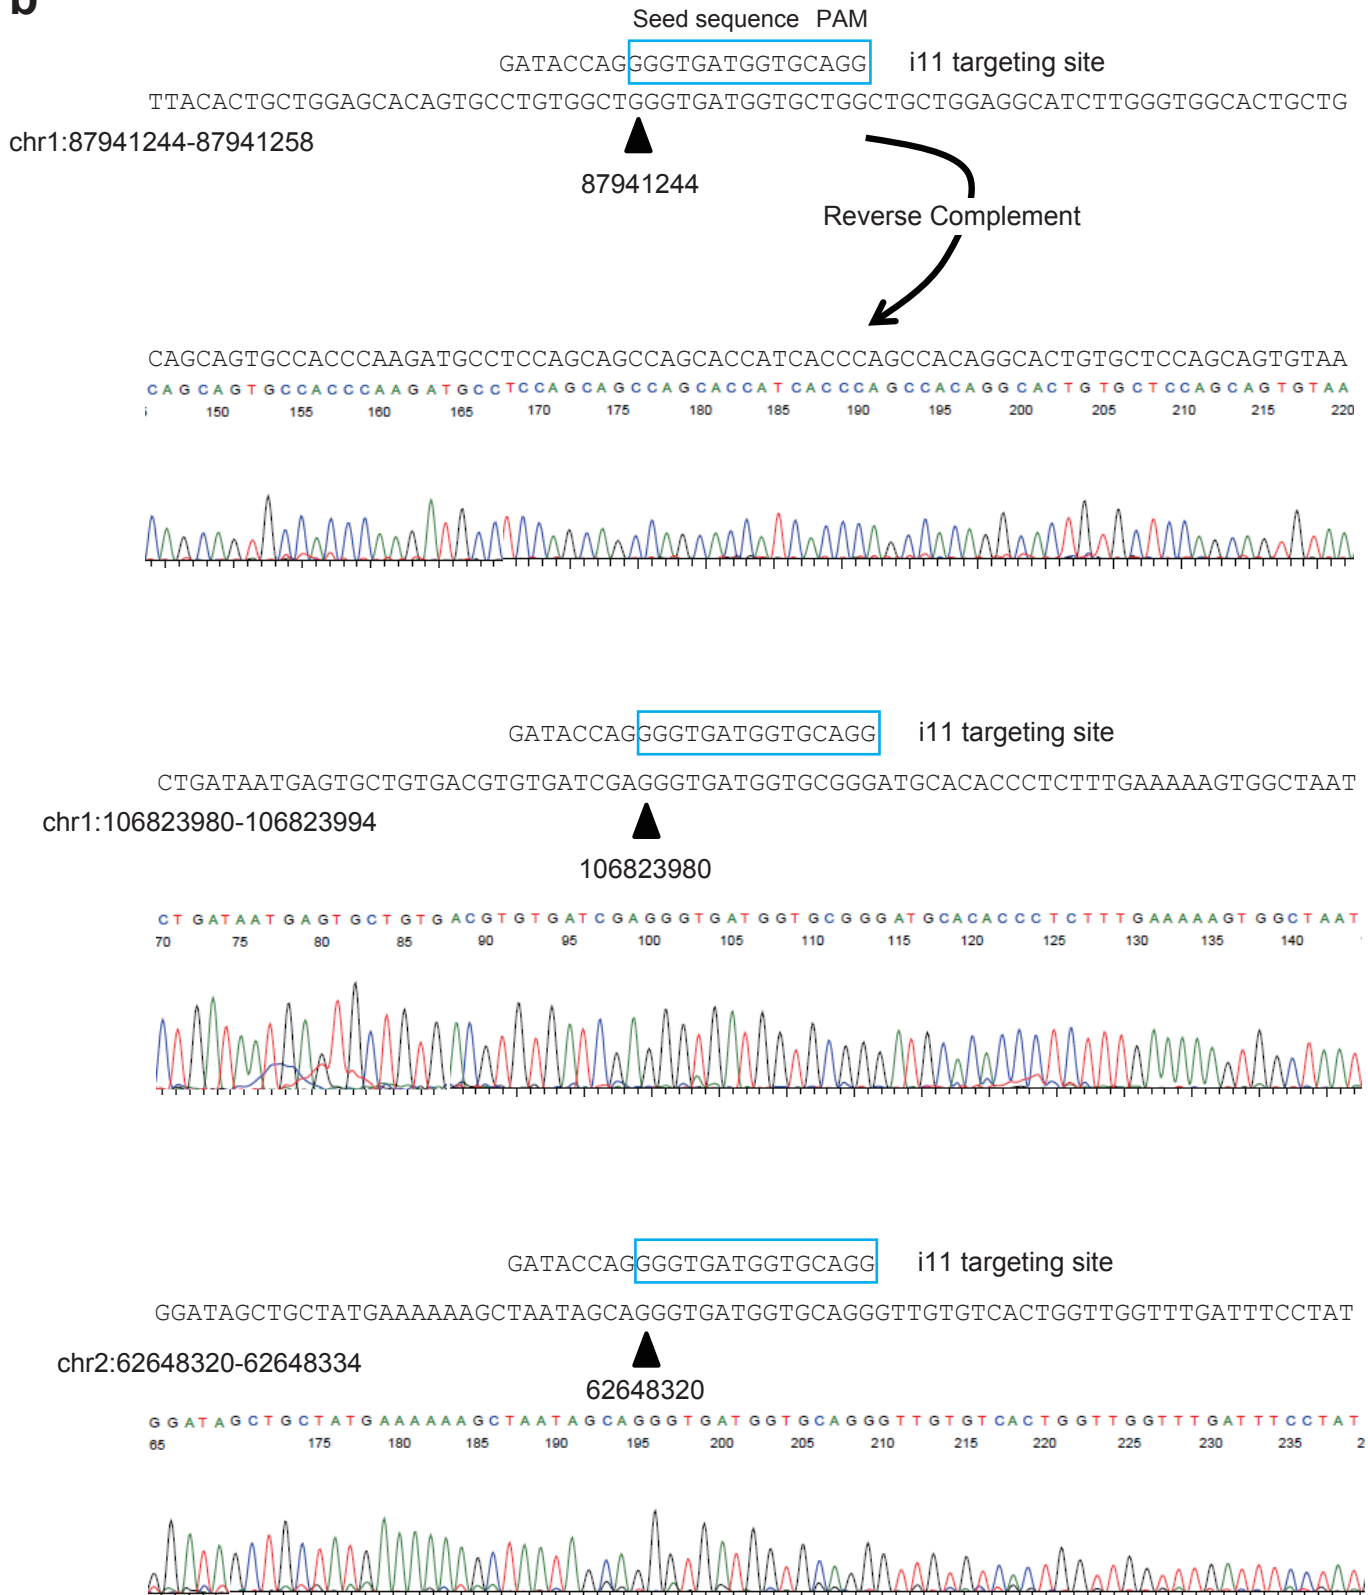

**Supplementary Figure 3 Analysis of the off-target effect.** The off-target sites that exactly match 12 bases at the 3' end and the NGG (blue box) were searched with free software CRISPR direct. The correct sequences around the off-target candidates against intron 3 (a) and 11 (b) of the *Creb3l3* genome were confirmed by sequencing.

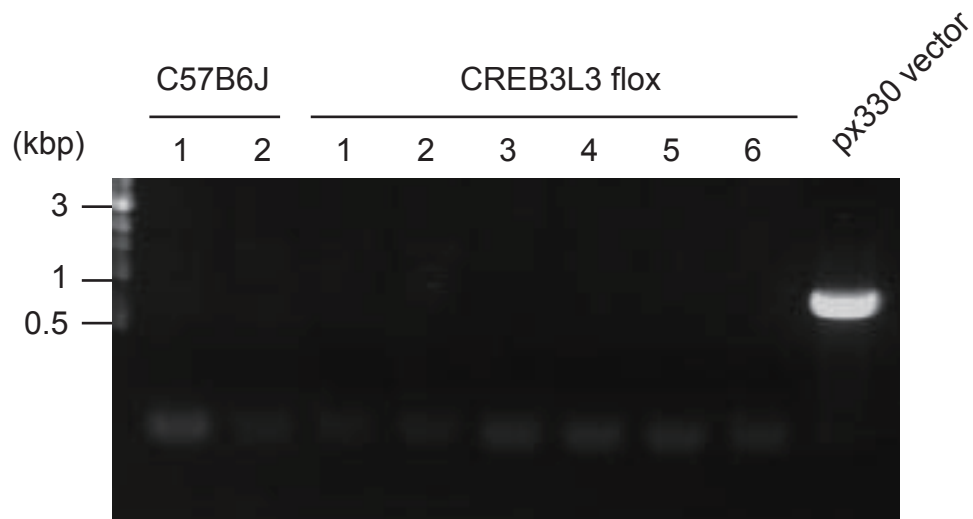

**Supplementary Figure 4** The analysis of integration of pX330 vector into mouse genome. The Cas9 cDNA were not observed in genome from CREB3L3 floxed mice by PCR.

|                | Fasted       |              |              | Fed          |              |                |
|----------------|--------------|--------------|--------------|--------------|--------------|----------------|
|                | flox         | LKO          | IKO          | flox         | LKO          | IKO            |
| BW (g)         | 22.83 ± 0.71 | 23.72 ± 0.39 | 21.95 ± 0.96 | 26.03 ± 0.92 | 26.69 ± 0.46 | 24.55 ± 1.16   |
| Lean wight (g) | 19 ± 0.69    | 19.62 ± 0.33 | 18.15 ± 0.87 | 21.9 ± 0.87  | 22.19 ± 0.43 | 20.2 ± 1.01    |
| Fat weight (g) | 3.83 ± 0.09  | 4.1 ± 0.16   | 3.73 ± 0.09  | 4.13 ± 0.12  | 4.49 ± 0.19  | 4.35 ± 0.15    |
| Fat weight (%) | 16.81 ± 0.56 | 17.29 ± 0.55 | 17.05 ± 0.36 | 15.94 ± 0.55 | 16.84 ± 0.66 | 17.675 ± 0.23* |

Supplementary Table 1 Body composition of CREBH LKO and IKO mice

Body composition of 8-week-old male mice fasted for 24 h and fed was determined by DEXA. n = 7 ~ 10 / group, \* p < 0.05.

|                     | Fasted        |               | Fed         |              |
|---------------------|---------------|---------------|-------------|--------------|
|                     | flox          | IKO           | flox        | IKO          |
| Glu (mg/dl)         | 74.0 ± 3.8    | 72.6 ± 4.6    | 161.8 ± 9.3 | 136.5 ± 5.6* |
| TG (mg/dl)          | 232.4 ± 23.2  | 207.2 ± 15.6  | 101.5 ± 5.7 | 105.1 ± 2.9  |
| Cholesterol (mg/dl) | 53.8 ± 3.4    | 64.4 ± 13.6   | 52.0 ± 3.4  | 46.2 ± 4.4   |
| FFA (mEq/l)         | 2.65 ± 0.15   | 2.39 ± 0.19   | 1.95 ± 0.13 | 2.09 ± 0.17  |
| FGF21 (pg/ml)       | 774.7 ± 154.9 | 787.0 ± 258.2 | 88.3 ± 38.6 | 76.0 ± 27.0  |

Supplementary Table 2 Plasma parameters in CREBH IKO mice

Samples were collected from 8-week-old male mice fasted for 24 h and fed. n = 7 ~ 10 / group, \* p < 0.05.



| Gene               | Fwd primer                         | Rv primer                       |
|--------------------|------------------------------------|---------------------------------|
| <i>Acox1</i>       | CGA TCC AGA CTT CCA ACA TGA G      | CCA TGG TGG CAC TCT TCT TAA CA  |
| <i>Acta2</i>       | CCC AGA CAT CAG GGA GTA ATG G      | TCT ATC GGA TAC TTC AGC GTC A   |
| <i>Apoa4</i>       | TTA CCC AGC TAA GCA ACA ATG C      | GAG GGT ACT GAG CTG CTG AGT GA  |
| <i>Apoa5</i>       | GCG AGT TCT GCC GTA GGA C          | CCC AAC CCC ATC AAA TGT GA      |
| <i>Apoc2</i>       | CCA AGG AGC TTG CCA AAG AC         | TGC CTG CGT AAG TGC TCA TG      |
| <i>Apoc3</i>       | TAG AGG GCT ACA TGG AAC AAG C      | CAG GGA TCT GAA GTG ATT GTC C   |
| <i>Ccl2</i>        | CCC ACT CAC CTG CTG CTA CT         | ATT TGG TTC CGA TCC AGG TT      |
| <i>Cd68</i>        | CCT CCA CCC TCG CCT AGT C          | TTG GGT ATA GGA TTC GGA TTT GA  |
| <i>Col1a1</i>      | GCT CCT CTT AGG GGC CAC T          | ATT GGG GAC CCT TAG GCC AT      |
| <i>Cpt1a</i>       | TCT TTC ACT GAG TTC CGA TGG G      | ACG CCA GAG ATG CCT TTT CC      |
| <i>Creb3l3</i>     | CCA GAC CCT TTA CCC ATA CAT        | ATG GTT GGA AGT TAG GGT TCA G   |
| <i>Cyp7a1</i>      | GCT GAG AGC TTG AAG CAC AAG A      | TTG AGA TGC CCA GAG GAT CAC     |
| <i>Cyclophilin</i> | TGG CTC ACA GTT CTT CAT AAC CA     | ATG ACA TCC TTC AGT GGC TTG TC  |
| <i>Elovl2</i>      | ACG CTG GTC ATC CTG TTC TT         | GCC ACA ATT AAG TGG GCT TT      |
| <i>Elovl5</i>      | ATG GAA CAT TTC GAT GCG TCA        | GTC CCA GCC ATA CAA TGA GTA AG  |
| <i>Elovl6</i>      | ACA ATG GAC CTG TCA GCA AA         | GTA CCA GTG CAG GAA GAT CAG T   |
| <i>F4/80</i>       | CTT TGG CTA TGG GCT TCC AGT C      | GCA AGG AGG ACA GAG TTT ATC GTG |
| <i>Fasn</i>        | ATC CTG GAA CGA CGA GAA CAC GAT CT | AGA GAC GTG TCA TCC TGG ACT T   |
| <i>Fgf21</i>       | AGA TCA GGG AGG ATG GAA CA         | TCA AAG TGA GGC GAT CCA TA      |
| <i>Fxr</i>         | CTC TGC TCA CAG CGA TCG TC         | CAC CGC CTC TCT GTC CTT GA      |
| <i>Hmgcr</i>       | GAG AAG AAG CCT GCT GCA TA         | CGT CAA CCA TAG CTT CCG TAG TT  |
| <i>Hmgcs1</i>      | GTG GCA CCG GAT GTC TTT G          | CTC TGA CCA GAT ACC ACG TTC     |
| <i>Il1b</i>        | GCA ACT GTT CCT GAA CTC AAC T      | ATC TTT TGG GGT CCG TCA ACT     |
| <i>Il6</i>         | TAG TCC TTC CTA CCC CAA TTT CC     | TTG GTC CTT AGC CAC TCC TTC     |
| <i>Ldlr</i>        | TGG AGG ATG AGA ACC GGC T          | GCA CTG AAA ATG GCT TCG TTT A   |
| <i>Ppara</i>       | CCT CAG GGT ACC ACT ACG GAG T      | GCC GAA TAG TTC GCC GAA         |
| <i>Scd1</i>        | AGA TCT CCA GTT CTT ACA CGA CCA C  | CTT TCA TTT CAG GAC GGA TGT CT  |
| <i>Shp</i>         | CAA GGA GTA TGC GTA CCT GAA G      | CCT GGC ACA TCT GGG TTG AAG     |
| <i>Srebf1a</i>     | AGG CGG CTC TGG AAC AGA            | TCA AAA CCG CTG TGT CCA GTT     |
| <i>Srebf1c</i>     | CGG CGC GGA AGC TGT                | TGC AAT CCA TGG CTC CGT         |
| <i>Srebf2</i>      | CTG CAG CCT CAA GTG CAA AG         | CAG TGT GCC ATT GGC TGT CT      |
| <i>Tgfb1</i>       | CCA CCT GCA AGA CCA TCG AC         | CTG GCG AGC CTT AGT TTG GAC     |
| <i>Tnfa</i>        | TCG TAG CAA ACC ACC AAG TG         | AGA TAG CAA ATC GGC TGA CG      |

Supplementary Table 3 QPCR primer sequences
